# Supplementary material for: A Palindrome-Like Structure on 16p13.3 Is Associated with the Formation of Complex Structural Variations and SRRM2 Haploinsufficiency
Source: Hum Mutat. 2023 Apr 11;2023:6633248. doi: 10.1155/2023/6633248 (PMC11918891; doi:10.1155/2023/6633248)
Supplement: Supplementary Materials — The file “SRRM2_supplementary_figures.docx” contains 2 supplementary figures: “Figure S1: dot plot showing interlinked palindrome and segmental duplications on 16p13.3” and “Figure S2: genome sequencing data indicates that an exonic deletion involving NEDD4L is mosaic”. In addition, “Table S1.pdf” contains “Table S1: Genetic and clinical details for 6 individuals from the 100K Genomes Project with loss of function variants in SRRM2”. [file 6633248.f1.zip]

Archive with 2 entries (2 files):
- SRRM2_supplementary_figures.docx
- Table S1_revision.pdf
